# Supplementary material
Source: bioRxiv or medRxiv preprint supplement (https://medrxiv.org/highwire/filestream/73863/field_highwire_adjunct_files/0/2020.03.16.20036822-1.pdf)
Supplement: Supplementary file [file 2020.03.16.20036822-1.pdf]

## SUPPLEMENTARY INFORMATION

### Supplementary Tables

|           |                                                                                                 |   |
|-----------|-------------------------------------------------------------------------------------------------|---|
| Table S1. | Sources of contributing data for genetic analyses and association statistics.....               | 2 |
| Table S2. | Binding specificity of protein C SOMAmer reagents.....                                          | 4 |
| Table S3. | Selection of instrumental variables for Mendelian randomization analyses .....                  | 5 |
| Table S4. | Summary of the results from Mendelian randomization analyses.....                               | 6 |
| Table S5. | Characteristics of the participants in the <i>PROCR</i> -p.S219G recall-by-genotype study ..... | 7 |

### Supplementary Figures

|            |                                                                                |    |
|------------|--------------------------------------------------------------------------------|----|
| Figure S1. | Protein C levels and risk of cardiovascular diseases.....                      | 8  |
| Figure S2. | Results from Mendelian randomization analyses .....                            | 10 |
| Figure S3. | EPCR monoclonal antibody testing for flow cytometry .....                      | 12 |
| Figure S4. | Quantification of surface EPCR on HUVECs .....                                 | 12 |
| Figure S5. | Quantification of surface EPCR on U937 cells .....                             | 13 |
| Figure S6. | Quantification of surface EPCR on monocytes and neutrophils .....              | 13 |
| Figure S7. | Gene expression profiles of <i>PROCR</i> , <i>ITGB2</i> and <i>ITGAM</i> ..... | 14 |

**Suppl. Table 1. Sources of contributing data for genetic analyses and association statistics.** The data comprise the latest available GWAS summary statistics for a range of cardiovascular diseases and risk factors. All data were collected from participants of European ancestry. Abbreviations: PMID, PubMed identifier; RbG, recall-by-genotype study; UKBB, UK Biobank; SE, standard error; MAF, minor allele frequency; OR, odds ratio.

| Source     | PMID              | Phenotype                 | Number of participants | Number of cases | Number of controls | Used for Phenome-scan | Used for HyPrColoc | Used for MR | Allele     | MAF   | P-value   | OR/beta | SE    |
|------------|-------------------|---------------------------|------------------------|-----------------|--------------------|-----------------------|--------------------|-------------|------------|-------|-----------|---------|-------|
| ARIC       | 20802025          | Factor VII                | 10,140                 | –               | –                  | No                    | Yes                | No          | rs867186-G | 0.097 | 8.72E-20  | 0.050   | 0.005 |
| ARIC       | 20802025          | Protein C                 | 8,911                  | –               | –                  | Yes                   | Yes                | Yes         | rs867186-G | 0.096 | 8.71E-237 | 0.455   | 0.014 |
| Astle W    | 27863252          | Mean platelet volume      | 173,480                | –               | –                  | Yes                   | No                 | No          | rs867186-G | NA    | 6.95E-01  | -0.002  | 0.006 |
| Astle W    | 27863252          | Monocyte count            | 173,480                | –               | –                  | Yes                   | No                 | No          | rs867186-G | NA    | 4.77E-01  | 0.004   | 0.006 |
| Astle W    | 27863252          | Platelet count            | 173,480                | –               | –                  | Yes                   | No                 | No          | rs867186-G | NA    | 1.65E-01  | 0.009   | 0.006 |
| Astle W    | 27863252          | Neutrophil count          | 173,480                | –               | –                  | Yes                   | No                 | No          | rs867186-G | NA    | 7.32E-03  | 0.017   | 0.006 |
| CHARGE     | 30586737          | Factor VIII               | 32,610                 | –               | –                  | Yes                   | No                 | No          | rs867186-G | 0.103 | 1.80E-01  | -0.017  | 0.004 |
| CHARGE     | 28053049          | Factor XI                 | 16,169                 | –               | –                  | Yes                   | No                 | No          | rs867186-G | 0.110 | 8.10E-02  | 0.028   | 0.004 |
| CHARGE     | 30642921          | Factor VII                | 23,434                 | –               | –                  | Yes                   | No                 | No          | rs867186-G | 0.104 | 3.25E-64  | 0.256   | 0.003 |
| GLGC       | 24097068          | HDL cholesterol           | 183,651                | –               | –                  | Yes                   | No                 | No          | rs867186-G | 0.098 | 4.19E-01  | -0.004  | 0.006 |
| GLGC       | 24097068          | LDL cholesterol           | 169,627                | –               | –                  | Yes                   | No                 | No          | rs867186-G | 0.098 | 5.32E-01  | 0.000   | 0.006 |
| GLGC       | 24097068          | Total cholesterol         | 183,793                | –               | –                  | Yes                   | No                 | No          | rs867186-G | 0.098 | 7.28E-01  | 0.001   | 0.006 |
| GLGC       | 24097068          | Triglycerides             | 174,314                | –               | –                  | Yes                   | No                 | No          | rs867186-G | 0.098 | 6.96E-01  | 0.003   | 0.006 |
| INVENT     | 25772935          | Venous thromboembolism    | 60,139                 | 7,507           | 52,632             | Yes                   | No                 | No          | rs867186-G | 0.101 | 1.21E-04  | 0.142   | 0.037 |
| Mahajan A  | 30297969          | Type 2 diabetes           | 298,957                | 48,286          | 250,671            | Yes                   | No                 | No          | rs867186-G | 0.109 | 6.88E-01  | -0.013  | 0.012 |
| MEGASTROKE | 29531354          | Cardioembolic stroke      | 347,338                | 8,092           | 339,246            | Yes                   | No                 | Yes         | rs867186-G | 0.103 | 1.96E-02  | -0.074  | 0.032 |
| MEGASTROKE | 29531354          | Any stroke                | 504,077                | 63,647          | 440,430            | Yes                   | No                 | Yes         | rs867186-G | 0.101 | 1.77E-03  | -0.044  | 0.014 |
| MEGASTROKE | 29531354          | Ischemic stroke           | 485,144                | 57,270          | 427,874            | Yes                   | No                 | Yes         | rs867186-G | 0.100 | 3.60E-03  | -0.044  | 0.015 |
| MEGASTROKE | 29531354          | Large-artery stroke       | 238,380                | 6,080           | 232,300            | Yes                   | No                 | Yes         | rs867186-G | 0.101 | 4.75E-01  | -0.028  | 0.039 |
| MEGASTROKE | 29531354          | Small-vessel stroke       | 284,377                | 11,071          | 273,306            | Yes                   | No                 | Yes         | rs867186-G | 0.089 | 6.38E-01  | 0.015   | 0.032 |
| RbG        | <i>This study</i> | Activated protein C       | 52                     | –               | –                  | Yes                   | No                 | No          | rs867186-G | NA    | 4.23E-01  | -0.135  | 0.167 |
| RbG        | <i>This study</i> | Thrombin/antithrombin-III | 51                     | –               | –                  | Yes                   | No                 | No          | rs867186-G | NA    | 4.59E-01  | -0.127  | 0.170 |
| RbG        | <i>This study</i> | Protein C activity        | 51                     | –               | –                  | Yes                   | No                 | No          | rs867186-G | NA    | 2.05E-04  | 0.595   | 0.148 |
| RbG        | <i>This study</i> | sEPCR                     | 52                     | –               | –                  | Yes                   | No                 | No          | rs867186-G | NA    | 3.29E-22  | 1.097   | 0.065 |
| Suhre K    | 28240269          | Factor IX                 | 1,000                  | –               | –                  | Yes                   | No                 | No          | rs867186-G | NA    | 6.73E-02  | -0.122  | 0.067 |
| Suhre K    | 28240269          | Protein S                 | 1,000                  | –               | –                  | Yes                   | No                 | No          | rs867186-G | NA    | 2.94E-01  | -0.073  | 0.069 |
| Suhre K    | 28240269          | Factor XI                 | 1,000                  | –               | –                  | Yes                   | No                 | No          | rs867186-G | NA    | 8.79E-01  | -0.010  | 0.067 |
| Suhre K    | 28240269          | Fibrinogen                | 1,000                  | –               | –                  | Yes                   | No                 | No          | rs867186-G | NA    | 9.81E-01  | -0.002  | 0.069 |
| Suhre K    | 28240269          | Factor V                  | 1,000                  | –               | –                  | Yes                   | No                 | No          | rs867186-G | NA    | 5.91E-01  | 0.037   | 0.070 |
| Suhre K    | 28240269          | Factor VII                | 1,000                  | –               | –                  | Yes                   | No                 | No          | rs867186-G | NA    | 8.85E-02  | 0.118   | 0.069 |
| Suhre K    | 28240269          | Protein C                 | 1,000                  | –               | –                  | Yes                   | No                 | No          | rs867186-G | NA    | 5.45E-38  | 0.838   | 0.062 |
| Sun B      | 29875488          | Factor VIII               | 3,301                  | –               | –                  | Yes                   | No                 | No          | rs867186-G | NA    | 6.46E-02  | -0.082  | 0.045 |
| Sun B      | 29875488          | Antithrombin-III          | 3,301                  | –               | –                  | Yes                   | No                 | No          | rs867186-G | NA    | 9.12E-01  | -0.005  | 0.045 |
| Sun B      | 29875488          | Tissue factor             | 3,301                  | –               | –                  | Yes                   | No                 | No          | rs867186-G | NA    | 9.77E-01  | 0.001   | 0.045 |

|                 |          |                         |         |         |         |     |     |     |            |       |          |        |       |
|-----------------|----------|-------------------------|---------|---------|---------|-----|-----|-----|------------|-------|----------|--------|-------|
| Sun B           | 29875488 | Prothrombin             | 3,301   | -       | -       | Yes | No  | No  | rs867186-G | NA    | 6.03E-02 | 0.084  | 0.045 |
| Sun B           | 29875488 | Factor X                | 3,301   | -       | -       | Yes | No  | No  | rs867186-G | NA    | 5.13E-02 | 0.087  | 0.045 |
| Sun B           | 29875488 | Factor Xa               | 3,301   | -       | -       | Yes | No  | No  | rs867186-G | NA    | 8.71E-03 | 0.117  | 0.045 |
| Sun B           | 29875488 | Activated protein C     | 3,301   | -       | -       | Yes | Yes | Yes | rs867186-G | NA    | 8.71E-09 | 0.256  | 0.044 |
| UKBB            | NA       | Aortic aneurysm         | 367,643 | 1,295   | 366,348 | Yes | No  | No  | rs867186-G | 0.088 | 5.09E-01 | -0.046 | 0.070 |
| UKBB            | NA       | Hypertension            | 367,643 | 119,500 | 248,143 | Yes | No  | No  | rs867186-G | 0.088 | 6.88E-03 | -0.024 | 0.009 |
| UKBB            | NA       | Pulmonary embolism      | 367,643 | 5,097   | 362,546 | Yes | No  | Yes | rs867186-G | 0.088 | 5.52E-04 | 0.122  | 0.035 |
| UKBB            | NA       | Venous thromboembolism  | 367,643 | 12,719  | 354,924 | Yes | No  | Yes | rs867186-G | 0.088 | 1.87E-09 | 0.136  | 0.023 |
| UKBB            | NA       | Deep venous thrombosis  | 367,643 | 8,891   | 358,752 | Yes | Yes | Yes | rs867186-G | 0.088 | 2.62E-10 | 0.170  | 0.027 |
| van der Harst P | 29212778 | Coronary artery disease | 547,261 | 122,733 | 424,528 | Yes | Yes | Yes | rs867186-G | 0.103 | 6.84E-12 | -0.057 | 0.008 |

**Suppl. Table 2. Binding specificity of protein C SOMAmer reagents.** We measured the binding activity ( $K_d$  value) of the three pivotal SOMAmer reagents targeting protein C to each of the commercially available proteins, i.e. protein C, APC, sEPCR, thrombin, factor VIIa, protein S, factor V and thrombomodulin. The SOMAmers were '2961-1\_2' (annotated as 'Protein C'), '3758-63\_3' (annotated as 'APC') and '3758-68\_3' (annotated as 'APC'). We confirmed that '2961-1\_2' binds both protein C and APC while SOMAmers '3758-63\_3' and '3758-68\_3' specifically bind APC. None of the three SOMAmers showed binding activity for the other proteins tested.

We then tested whether sEPCR and thrombomodulin interfere with the SOMAmer reagent binding to protein C or whether sEPCR, protein S and factor VIIa interfere with the SOMAmer reagents binding to APC. The results indicate sEPCR and thrombomodulin do not compete with '2961-1\_2' for binding to protein C, and sEPCR, protein S and factor VIIa do not compete with '2961-1\_2', '3758-63\_3' or '3758-68\_3' for binding to APC.

|                       | <b>2961-1_2</b>                                                                                 | <b>3758-63_3</b>                 | <b>3758-68_3</b>                 |
|-----------------------|-------------------------------------------------------------------------------------------------|----------------------------------|----------------------------------|
| <b>Protein C</b>      | $2.3 \times 10^{-8} \text{ M}$                                                                  | $> 1.0 \times 10^{-7} \text{ M}$ | $> 1.0 \times 10^{-7} \text{ M}$ |
| <b>APC</b>            | $2.1 \times 10^{-8} \text{ M}$                                                                  | $1.2 \times 10^{-8} \text{ M}$   | $6.8 \times 10^{-9} \text{ M}$   |
| <b>sEPCR</b>          | <i>no binding at protein concentrations<br/>up to <math>1.0 \times 10^{-7} \text{ M}</math></i> |                                  |                                  |
| <b>Thrombin</b>       |                                                                                                 |                                  |                                  |
| <b>Factor VIIa</b>    |                                                                                                 |                                  |                                  |
| <b>Protein S</b>      |                                                                                                 |                                  |                                  |
| <b>Factor V</b>       |                                                                                                 |                                  |                                  |
| <b>Thrombomodulin</b> |                                                                                                 |                                  |                                  |

**Suppl. Table 3. Selection of instrumental variables for Mendelian randomization analyses.** The tables provides further details on the instrumental variables that we selected for the construction of a multi-allelic genetic score at the *PROCR* region to estimate the causal associations between PC/APC and cardiovascular outcomes (i.e. CAD and DVT) (Methods). Further information on the data sources for these analyses are provided in Suppl. Table 4. Abbreviations: chr, chromosome; SE, standard error; P-val, P-value; EAF, effect allele frequency.

| SNP         | Chr | Position (GRCh37) | Effect allele | Other allele | Exposure | Units | Sample size | EAF   | $\beta$ | SE    | P-val     | F-stat | Correct causal direction |
|-------------|-----|-------------------|---------------|--------------|----------|-------|-------------|-------|---------|-------|-----------|--------|--------------------------|
| rs867186    | 20  | 33764554          | A             | G            | APC      | SD    | 3,301       | 0.914 | -0.256  | 0.044 | 8.71E-09  | 33     | TRUE                     |
| rs112928119 | 20  | 33726451          | C             | T            | PC       | SD    | 8,911       | 0.773 | 0.135   | 0.010 | 3.93E-40  | 176    | TRUE                     |
| rs145578591 | 20  | 33970133          | G             | A            | PC       | SD    | 8,911       | 0.982 | -0.382  | 0.034 | 1.54E-29  | 127    | TRUE                     |
| rs146348076 | 20  | 32526802          | T             | A            | PC       | SD    | 8,911       | 0.976 | -0.345  | 0.029 | 8.00E-33  | 142    | TRUE                     |
| rs148316982 | 20  | 35367029          | A             | C            | PC       | SD    | 8,911       | 0.978 | -0.209  | 0.032 | 1.05E-10  | 42     | TRUE                     |
| rs17332951  | 20  | 32764183          | T             | C            | PC       | SD    | 8,911       | 0.951 | -0.314  | 0.020 | 3.59E-57  | 254    | TRUE                     |
| rs182198088 | 20  | 33628212          | T             | C            | PC       | SD    | 8,911       | 0.991 | -0.411  | 0.046 | 6.86E-19  | 79     | TRUE                     |
| rs185595411 | 20  | 34222491          | G             | T            | PC       | SD    | 8,911       | 0.986 | -0.428  | 0.038 | 5.99E-29  | 125    | TRUE                     |
| rs190284633 | 20  | 32833621          | G             | A            | PC       | SD    | 8,911       | 0.990 | -0.340  | 0.043 | 4.57E-15  | 61     | TRUE                     |
| rs2425068   | 20  | 34214723          | T             | C            | PC       | SD    | 8,911       | 0.941 | -0.206  | 0.023 | 2.31E-19  | 81     | TRUE                     |
| rs34140587  | 20  | 32506150          | C             | G            | PC       | SD    | 8,911       | 0.392 | 0.059   | 0.009 | 1.60E-11  | 45     | TRUE                     |
| rs4911468   | 20  | 33694254          | A             | T            | PC       | SD    | 8,911       | 0.320 | -0.054  | 0.010 | 1.38E-08  | 32     | TRUE                     |
| rs56317999  | 20  | 35386235          | G             | A            | PC       | SD    | 8,911       | 0.972 | -0.176  | 0.029 | 1.20E-09  | 37     | TRUE                     |
| rs6088887   | 20  | 34171324          | G             | A            | PC       | SD    | 8,911       | 0.807 | 0.071   | 0.011 | 4.45E-11  | 43     | TRUE                     |
| rs6120993   | 20  | 34185161          | G             | T            | PC       | SD    | 8,911       | 0.860 | -0.069  | 0.012 | 2.94E-08  | 31     | TRUE                     |
| rs7263119   | 20  | 32254831          | G             | T            | PC       | SD    | 8,911       | 0.517 | 0.049   | 0.009 | 1.32E-08  | 32     | TRUE                     |
| rs7271630   | 20  | 32449398          | T             | C            | PC       | SD    | 8,911       | 0.840 | -0.107  | 0.012 | 6.89E-20  | 83     | TRUE                     |
| rs73105074  | 20  | 33213192          | A             | C            | PC       | SD    | 8,911       | 0.959 | 0.146   | 0.025 | 2.79E-09  | 35     | TRUE                     |
| rs867186    | 20  | 33764554          | A             | G            | PC       | SD    | 8,911       | 0.904 | -0.455  | 0.014 | 1.00E-200 | 1,080  | TRUE                     |
| rs906466    | 20  | 35048632          | G             | A            | PC       | SD    | 8,911       | 0.807 | -0.073  | 0.011 | 1.52E-11  | 46     | TRUE                     |

**Suppl. Table 4. Summary of the results from Mendelian randomization analyses.** We applied the Wald’s ratio method when only 1 instrumental variant was available and the inverse- variance weighted (IVW) method in a multiplicative random-effect meta-analysis framework when >3 instrumental variants were available. We also applied the MR-Egger regression and MR-PRESSO to estimate causal effects. Further, we performed several sensitivity analyses to assess the robustness of our results to potential violations of the MR assumptions (Methods).  $\beta$ -values (causal effect estimates), odds ratios and P-values were derived the different MR methods. Q-statistic and respective P-values are shown from the Cochran’s Q-test for heterogeneity. Egger-intercept and respective P-values are provided for horizontal pleiotropy by MR-Egger. Abbreviations: IVW, inverse-variance weighting; SE, standard error; P-val, P-value; CI, confidence interval; N, number; OR, odds ratio.

*Protein C → Cardiovascular outcomes:*

| Exposure | Outcome              | N (SNPs) | MR Wald’s Ratio/IVW |                  |          |                | MR-Egger      |                  |          |                         | MR-PRESSO     |                  |          |
|----------|----------------------|----------|---------------------|------------------|----------|----------------|---------------|------------------|----------|-------------------------|---------------|------------------|----------|
|          |                      |          | $\beta$ (SE)        | OR [95% CI]      | P-val    | Q-stat (P-val) | $\beta$ (SE)  | OR [95% CI]      | P-val    | Egger intercept (P-val) | $\beta$ (SE)  | OR [95% CI]      | P-val    |
| PC       | CAD                  | 19       | -0.13 (0.013)       | 0.88 [0.86,0.90] | 4.17E-24 | 17.24 (0.51)   | -0.14 (0.018) | 0.87 [0.84,0.90] | 7.42E-14 | 0.002 (0.44)            | -0.13 (0.012) | 0.88 [0.86,0.90] | 5.27E-09 |
| PC       | Stroke               | 18       | -0.11 (0.023)       | 0.90 [0.86,0.94] | 2.86E-06 | 13.79 (0.68)   | -0.12 (0.034) | 0.89 [0.83,0.95] | 3.94E-04 | 0.003 (0.59)            | -0.11 (0.020) | 0.90 [0.86,0.94] | 7.26E-05 |
| PC       | Ischemic stroke      | 18       | -0.10 (0.025)       | 0.90 [0.86,0.95] | 3.77E-05 | 12.48 (0.77)   | -0.10 (0.037) | 0.90 [0.84,0.97] | 4.70E-03 | 0.0003 (0.96)           | -0.10 (0.021) | 0.90 [0.87,0.94] | 1.64E-04 |
| PC       | Large-artery stroke  | 18       | -0.06 (0.064)       | 0.94 [0.83,1.07] | 3.76E-01 | 15.86 (0.53)   | -0.05 (0.096) | 0.95 [0.79,1.15] | 5.98E-01 | -0.001 (0.93)           | -0.06 (0.062) | 0.94 [0.84,1.07] | 3.72E-01 |
| PC       | Cardioembolic stroke | 18       | -0.16 (0.051)       | 0.85 [0.77,0.94] | 2.10E-03 | 17.83 (0.40)   | -0.25 (0.075) | 0.78 [0.67,0.90] | 7.32E-04 | 0.019 (0.09)            | -0.16 (0.051) | 0.85 [0.77,0.94] | 6.85E-03 |
| PC       | Small-vessel stroke  | 18       | -0.06 (0.066)       | 0.94 [0.82,1.07] | 3.32E-01 | 21.24 (0.22)   | 0.05 (0.094)  | 1.05 [0.88,1.27] | 5.84E-01 | -0.023 (0.10)           | -0.06 (0.066) | 0.94 [0.82,1.07] | 3.46E-01 |
| PC       | DVT                  | 18       | 0.30 (0.037)        | 1.34 [1.25,1.44] | 8.70E-16 | 14.21 (0.65)   | 0.36 (0.053)  | 1.44 [1.30,1.59] | 4.53E-12 | -0.016 (0.07)           | 0.30 (0.034)  | 1.34 [1.26,1.43] | 9.76E-08 |
| PC       | PE                   | 18       | 0.16 (0.052)        | 1.17 [1.06,1.29] | 2.65E-03 | 19.01 (0.33)   | 0.24 (0.071)  | 1.27 [1.11,1.46] | 6.91E-04 | -0.019 (0.10)           | 0.16 (0.052)  | 1.17 [1.06,1.29] | 7.97E-03 |
| PC       | VTE                  | 18       | 0.22 (0.032)        | 1.24 [1.17,1.32] | 1.05E-11 | 17.80 (0.40)   | 0.28 (0.045)  | 1.33 [1.22,1.45] | 2.10E-10 | -0.015 (0.04)           | 0.22 (0.032)  | 1.24 [1.17,1.32] | 3.10E-06 |
| APC      | CAD                  | 1        | -0.22 (0.033)       | 0.80 [0.75,0.85] | 9.01E-12 | NA             | NA            | NA               | NA       | NA                      | NA            | NA               | NA       |
| APC      | Stroke               | 1        | -0.19 (0.062)       | 0.83 [0.73,0.94] | 2.76E-03 | NA             | NA            | NA               | NA       | NA                      | NA            | NA               | NA       |
| APC      | Ischemic stroke      | 1        | -0.19 (0.068)       | 0.83 [0.72,0.95] | 5.60E-03 | NA             | NA            | NA               | NA       | NA                      | NA            | NA               | NA       |
| APC      | Large-artery stroke  | 1        | -0.11 (0.180)       | 0.90 [0.63,1.28] | 5.54E-01 | NA             | NA            | NA               | NA       | NA                      | NA            | NA               | NA       |
| APC      | Cardioembolic stroke | 1        | -0.38 (0.138)       | 0.68 [0.52,0.89] | 5.42E-03 | NA             | NA            | NA               | NA       | NA                      | NA            | NA               | NA       |
| APC      | Small-vessel stroke  | 1        | -0.10 (0.163)       | 0.90 [0.65,1.24] | 5.28E-01 | NA             | NA            | NA               | NA       | NA                      | NA            | NA               | NA       |
| APC      | DVT                  | 1        | 0.62 (0.099)        | 1.87 [1.54,2.26] | 2.74E-10 | NA             | NA            | NA               | NA       | NA                      | NA            | NA               | NA       |
| APC      | PE                   | 1        | 0.45 (0.132)        | 1.58 [1.22,2.04] | 5.56E-04 | NA             | NA            | NA               | NA       | NA                      | NA            | NA               | NA       |
| APC      | VTE                  | 1        | 0.50 (0.084)        | 1.66 [1.40,1.95] | 1.92E-09 | NA             | NA            | NA               | NA       | NA                      | NA            | NA               | NA       |

*Cardiovascular outcomes → protein C:*

| Exposure | Outcome | N (SNPs) | MR IVW        |                  |       |                | MR-PRESSO     |                  |       |
|----------|---------|----------|---------------|------------------|-------|----------------|---------------|------------------|-------|
|          |         |          | $\beta$ (SE)  | OR [95% CI]      | P-val | Q-stat (P-val) | $\beta$ (SE)  | OR [95% CI]      | P-val |
| CAD      | APC     | 138      | -0.01 (0.049) | 0.99 [0.90,1.09] | 0.837 | 144.15 (0.32)  | -0.01 (0.049) | 0.99 [0.90,1.09] | 0.837 |
| VTE      | APC     | 19       | -0.06 (0.045) | 0.94 [0.86,1.02] | 0.157 | 22.71 (0.20)   | -0.06 (0.045) | 0.94 [0.86,1.02] | 0.174 |
| DVT      | APC     | 17       | -0.06 (0.037) | 0.94 [0.87,1.01] | 0.101 | 18.23 (0.31)   | -0.06 (0.037) | 0.94 [0.87,1.01] | 0.120 |

**Suppl. Table 5. Characteristics of the participants in the *PROCR-p.S219G* recall-by-genotype study.** Characteristics of healthy volunteers are presented as mean and standard deviation (in brackets) or percentage, as appropriate. Characteristics were compared between the homozygous groups (Methods). Abbreviations: DSP, diastolic blood pressure; HR, heart rate; SBP, systolic blood pressure.

|                          | rs867186-AA  | rs867186-AG  | rs867186-GG  | P-value |
|--------------------------|--------------|--------------|--------------|---------|
| Number of participants   | 18           | 16           | 18           | –       |
| Female (%)               | 33.3         | 31.2         | 33.3         | 0.60    |
| Current smokers (%)      | 0            | 0            | 0            | –       |
| Family history (%)       | 66.7         | 81.2         | 77.8         | –       |
| Age (year)               | 49.6 (11.4)  | 49.6 (8.0)   | 49.9 (10.6)  | 0.93    |
| Height (cm)              | 173.9 (9.2)  | 173.0 (8.5)  | 175.3 (8.4)  | 0.64    |
| Weight (kg)              | 76.1 (12.5)  | 76.6 (11.2)  | 78.1 (11.4)  | 0.57    |
| BMI (kg/m <sup>2</sup> ) | 25.1 (3.4)   | 25.6 (3.1)   | 25.4 (2.6)   | 0.78    |
| Body fat (%)             | 24.6 (8.8)   | 23.6 (9.5)   | 24.2 (8.5)   | 0.89    |
| SBP, seated (mmHg)       | 125.6 (14.7) | 127.6 (15.4) | 126.5 (17.8) | 0.85    |
| DBP, seated (mmHg)       | 75.0 (11.5)  | 80.1 (9.4)   | 78.0 (12.8)  | 0.38    |
| HR, seated (beats/min)   | 69.6 (20.6)  | 64.9 (9.6)   | 65.4 (11.8)  | 0.44    |
| SBP, standing (mmHg)     | 123.6 (12.5) | 130.7 (17.9) | 125.6 (16.5) | 0.65    |
| DBP, standing (mmHg)     | 78.0 (12.0)  | 82.6 (9.9)   | 81.5 (10.7)  | 0.29    |
| HR, standing (beats/min) | 74.3 (13.1)  | 72.8 (11.6)  | 72.8 (14.3)  | 0.75    |

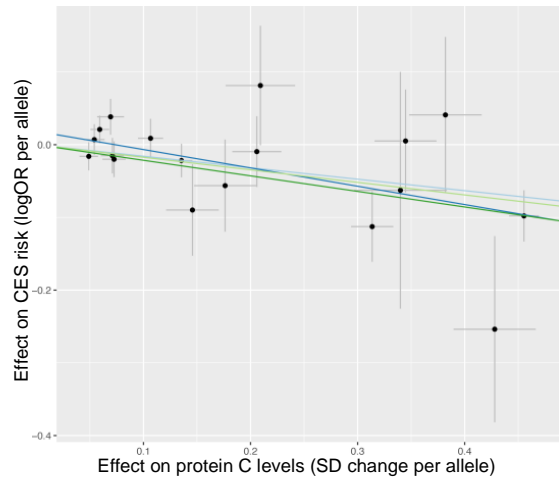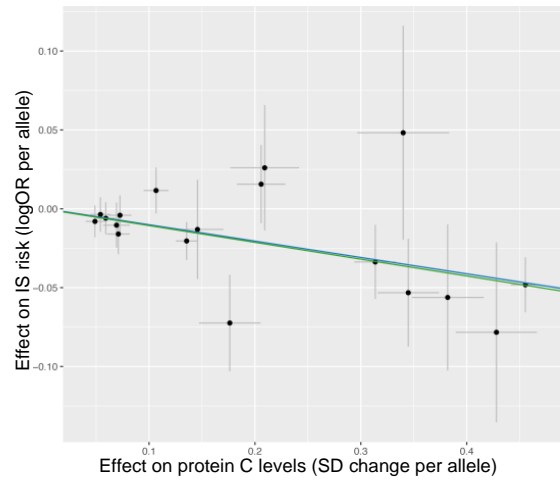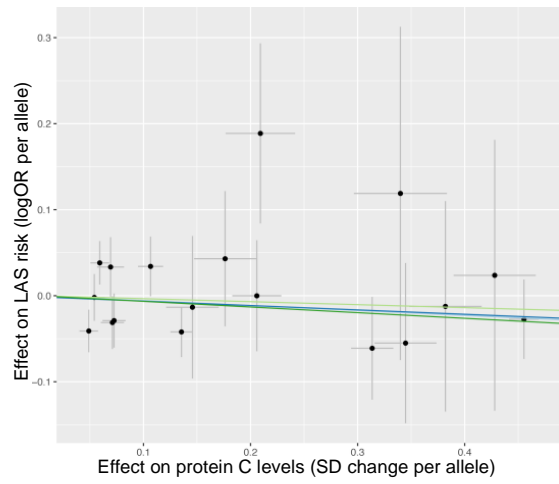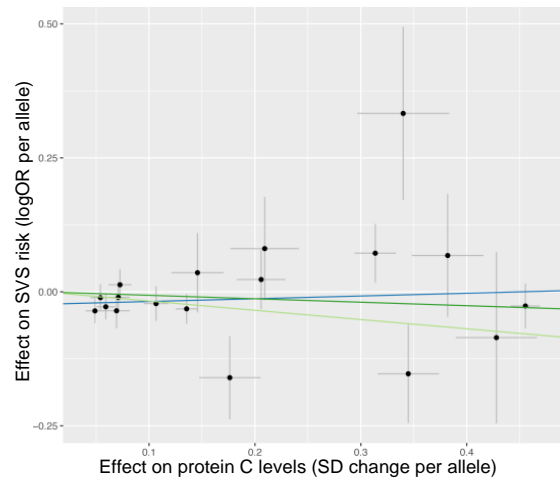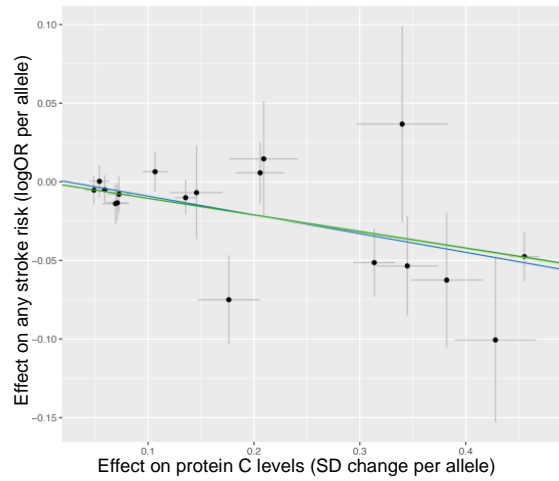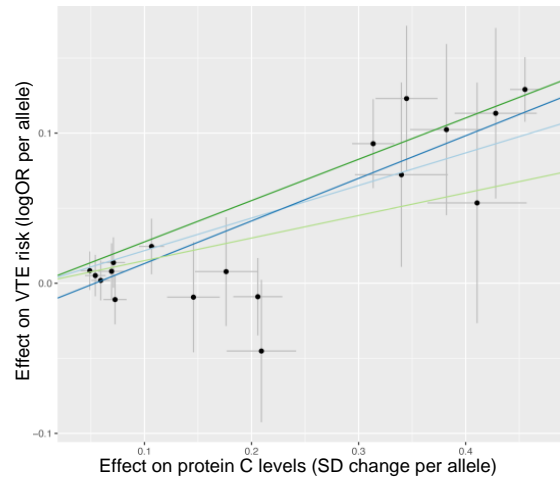



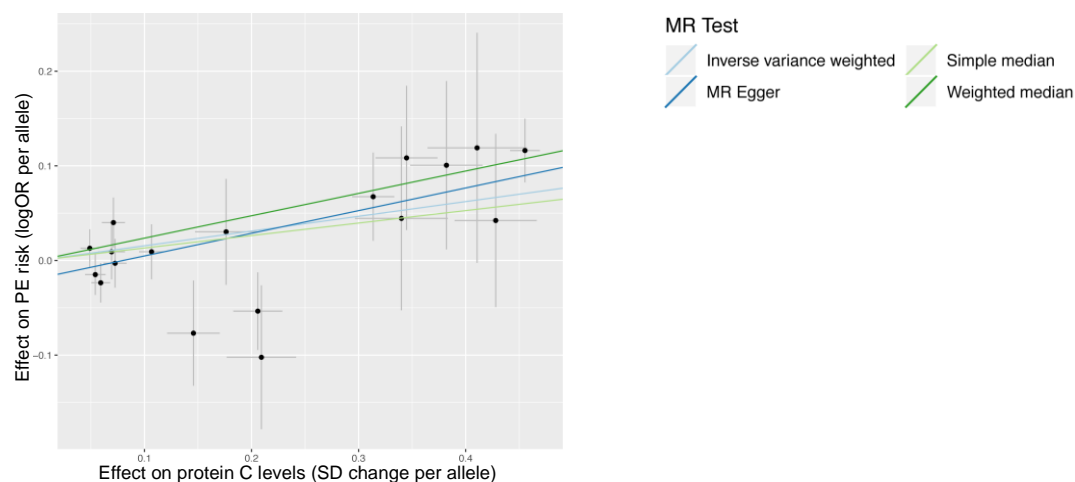

**Figure S1. Protein C levels and risk of cardiovascular diseases.** Scatter plot showing the estimated effect sizes and 95% confidence intervals on plasma protein C levels (from linear regression) and risk of several cardiovascular diseases (from logistic regression) for each variant used in the genetic score. The different regression lines indicate the effect sizes as calculated by different MR tests. Abbreviations: LAS, large-artery stroke; IS, ischemic stroke; CES, cardioembolic stroke; SVS, small-vessel stroke; VTE, venous thromboembolism; PE, pulmonary embolism.

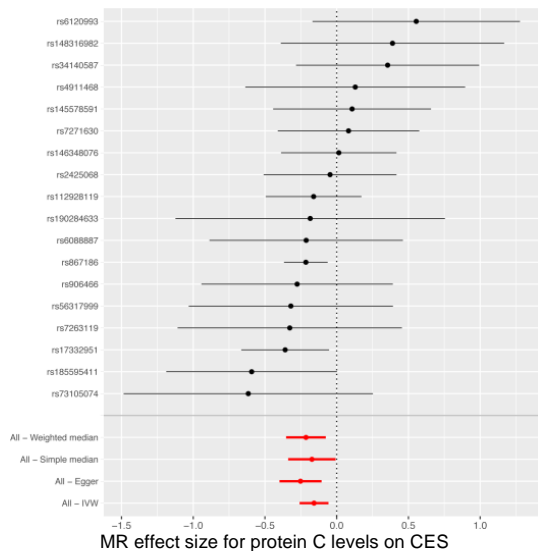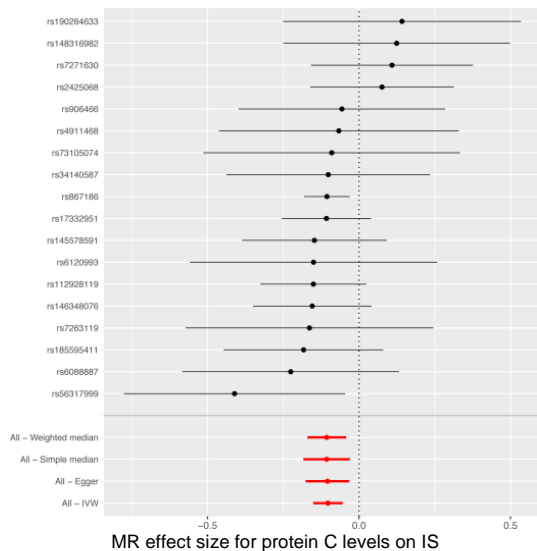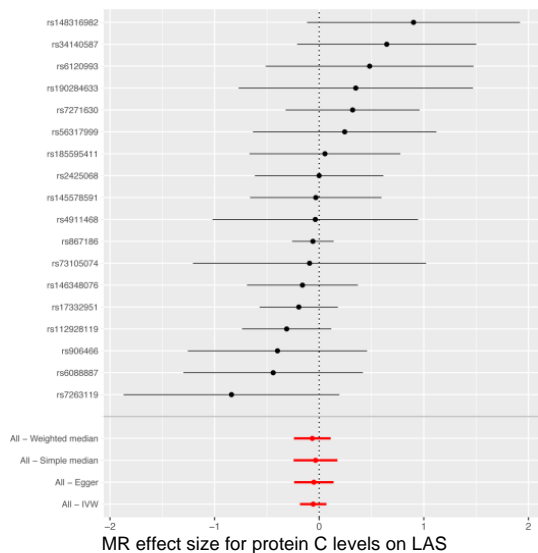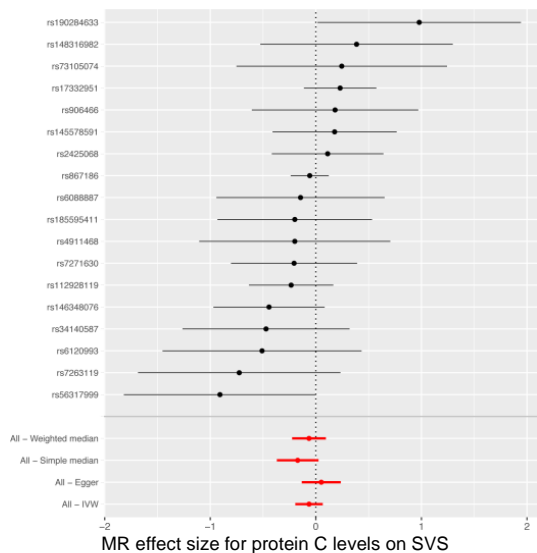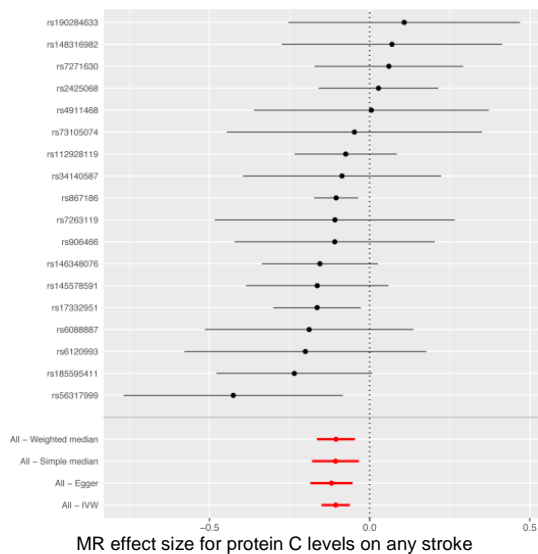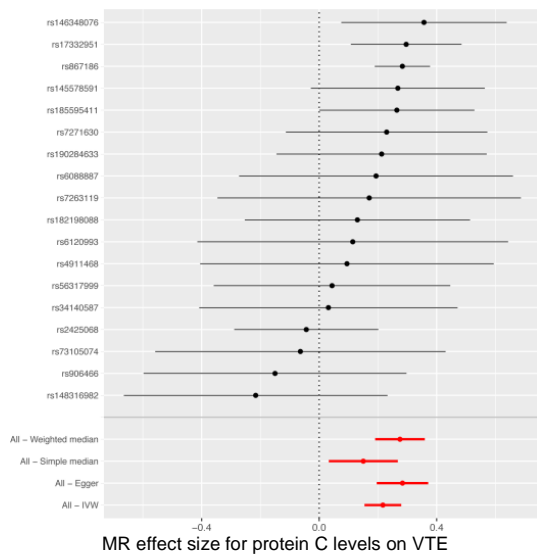

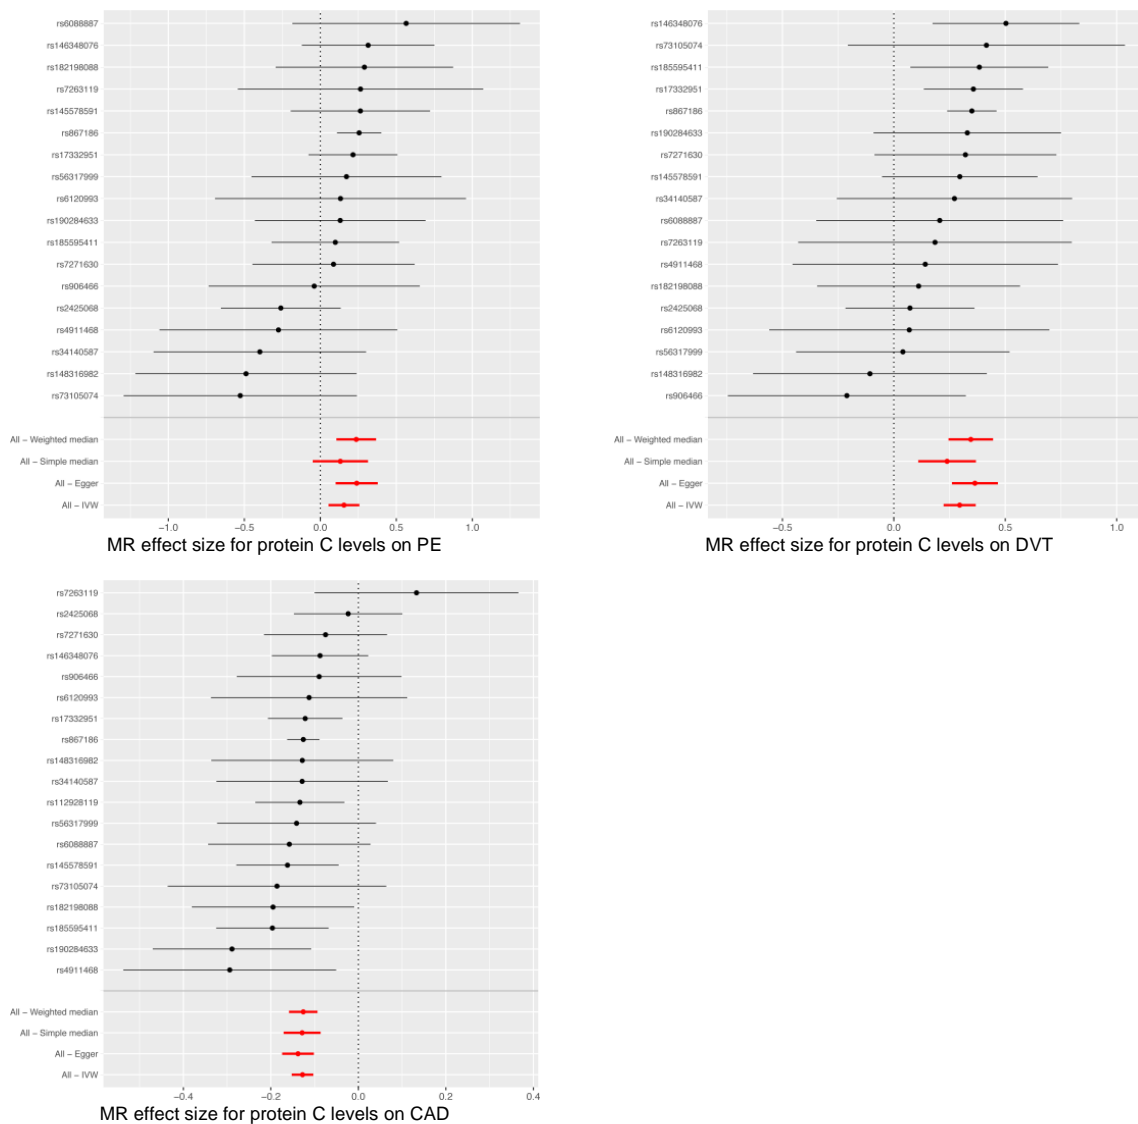

**Figure S2. Results from Mendelian randomization analyses.** Forest plot showing the MR effect sizes and 95% confidence intervals (IVW method). Abbreviations: LAS, large-artery stroke; IS, ischemic stroke; CES, cardioembolic stroke; SVS, small-vessel stroke; VTE, venous thromboembolism; PE, pulmonary embolism; DVT, deep vein thrombosis; CAD, coronary artery disease.

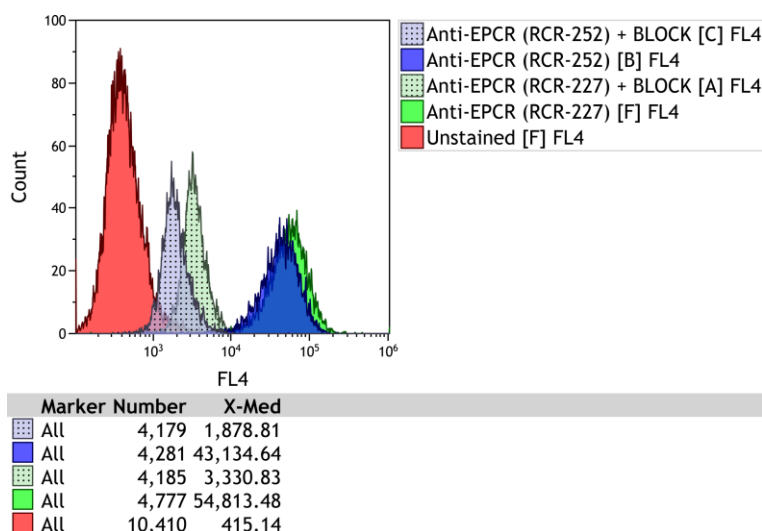

**Figure S3. EPCR monoclonal antibody testing for flow cytometry.** Fluorescence intensities (FL4 channel) for human umbilical vein endothelial cells (HUVECs) stained using two allophycocyanin (APC)-conjugated EPCR monoclonal antibodies derived from distinct clones, RCR-252 and RCR-227. EPCR has been shown to be highly expressed on the surface of HUVECs (Medina et al. (2014) *Arterioscler Thromb Vasc Biol.* 34(3), 684-90). Accordingly, both antibodies yielded very high signals with median fluorescence intensities (MFI) of 43,135 and 54,813 for clones RCR-252 and RCR-227, respectively, relative to an unstained MFI of 415. To confirm the specificity of these signals, we incubated HUVECs with an unconjugated EPCR monoclonal antibody derived from the RCR-252 clone ('BLOCK') prior to the addition of an APC-conjugated antibody and subsequent flow cytometry. For both clones, we observed a marked reduction in MFI signal with a 5:1 ratio of unconjugated to APC-conjugated antibody. Taken together, these findings indicate that both of the APC-conjugated antibodies (RCR-252 and RCR-227) are specific to the EPCR protein. Abbreviations: X-Med, median fluorescence intensity.

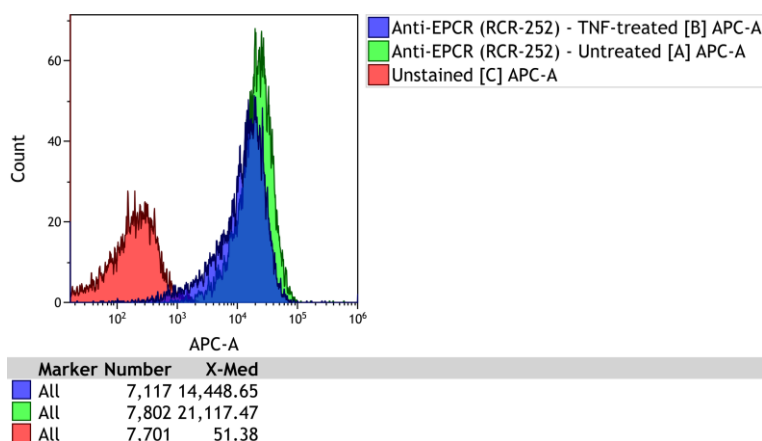

**Figure S4. Quantification of surface EPCR on HUVECs.** Fluorescence intensities (APC-A channel) for HUVECs treated with 10 ng/ml tumor necrosis factor (TNF) or vehicle control and stained using an APC-conjugated EPCR monoclonal antibody derived from the RCR-252 clone. Abbreviations: X-Med, median fluorescence intensity.

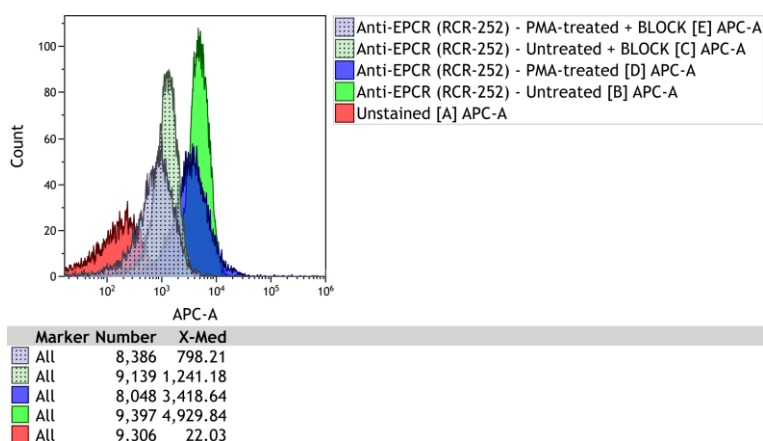

**Figure S5. Quantification of surface EPCR on U937 cells.** Fluorescence intensities (APC-A channel) for U937 cells treated with 100 ng/ml phorbol 12-myristate 13-acetate (PMA) or vehicle control and stained using an APC-conjugated EPCR monoclonal antibody derived from the RCR-252 clone. The specificity of the vehicle control signal was assessed by pre-incubating cells with an unconjugated blocking antibody ('BLOCK') prior to staining. Abbreviations: X-Med, median fluorescence intensity.

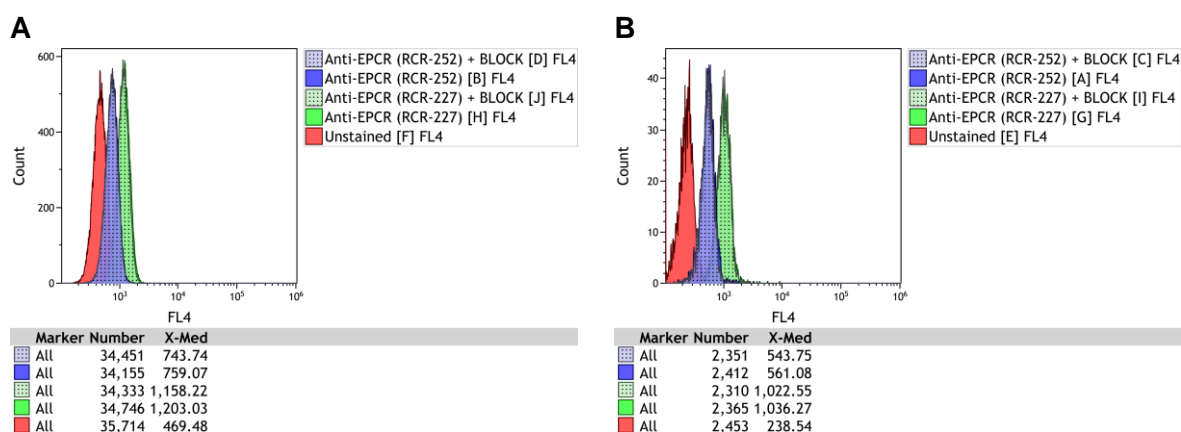

**Figure S6. Quantification of surface EPCR on monocytes and neutrophils.** Previous studies have indicated that EPCR is expressed in other cell types beyond endothelial cells, including immune cells such as monocytes and neutrophils (Gleeson et al. (2012) *Cell Mol Life Sci.* 69(5), 717-26). To explore this, we performed flow cytometry in both primary human neutrophils (A) and monocytes (B) using two APC-conjugated EPCR monoclonal antibodies derived from distinct clones (RCR-252 and RCR-227). We observed small MFI signals (FL4 channel) of comparable magnitude for both cell types, suggesting that EPCR may be weakly expressed on the surface of monocytes and neutrophils. However, when we pre-incubated both cell types with unconjugated EPCR antibody ('BLOCK') we did not observe any reduction in signal. This indicates that the small signal observed in monocytes and neutrophils using the APC-conjugated antibodies reflects non-specific binding, suggesting that EPCR is not expressed at detectable (by flow cytometry) levels on the surface of either of these two cell types. Abbreviations: X-Med, median fluorescence intensity.

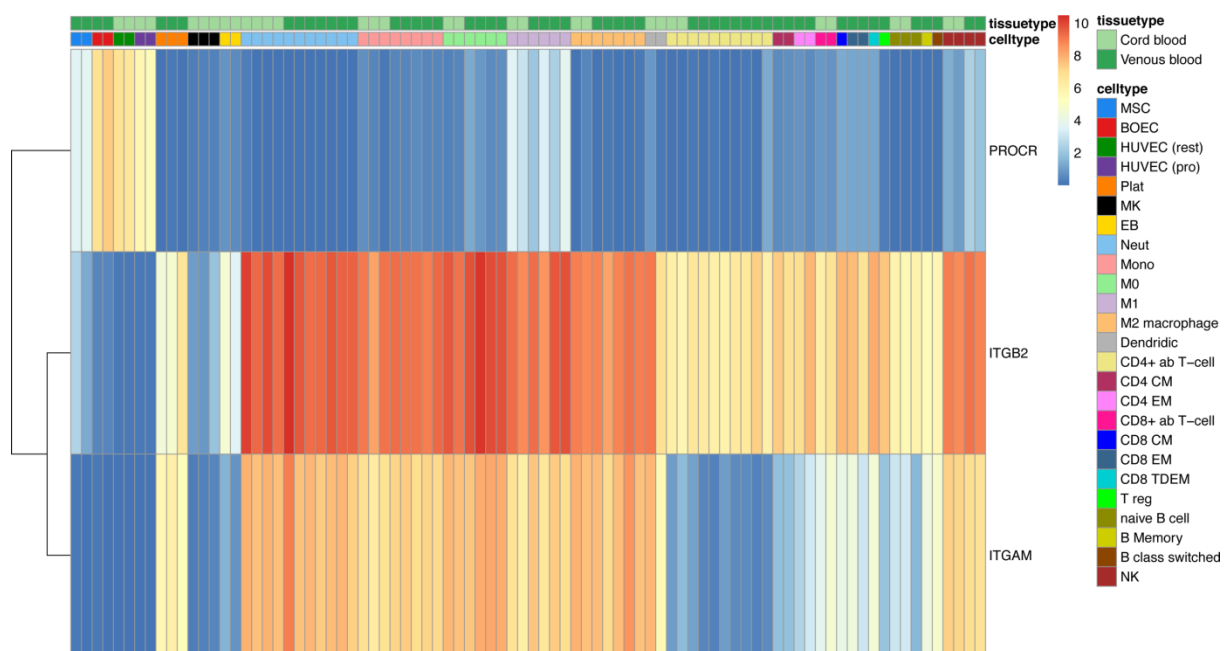

**Figure S7. Gene expression profiles of *PROCOR*, *ITGB2* and *ITGAM*.** Heatmap showing the normalized expression levels of selected candidate genes across a wide range of primary human blood cells (Grassi et al. (2019) *bioRxiv* 764613). Data are shown for the *PROCOR* gene (encoding the endothelial protein C receptor), *ITGAM* (CD11b) and *ITGB2* (CD18). CD11b and CD18 constitute the Macrophage-1 antigen.
